# Supplementary material for: Poly(β-thioesters) containing monodisperse oxamide hard segments using a chemoselective thiol-Michael addition reaction
Source: Royal Society of Chemistry journal article supplement (doi:10.1039/c7py00021a), 2017-01-01

Supporting Information

Poly( $\beta$ -thioesters) Containing Monodisperse Oxamide Hard Segments Using a Chemoselective Thiol-Michael Addition Reaction

Nicholas G. Moon, Ryan Mondschein, Timothy E. Long

*Department of Chemistry, Macromolecules Innovation Institute, Virginia Tech, Blacksburg VA 24061*

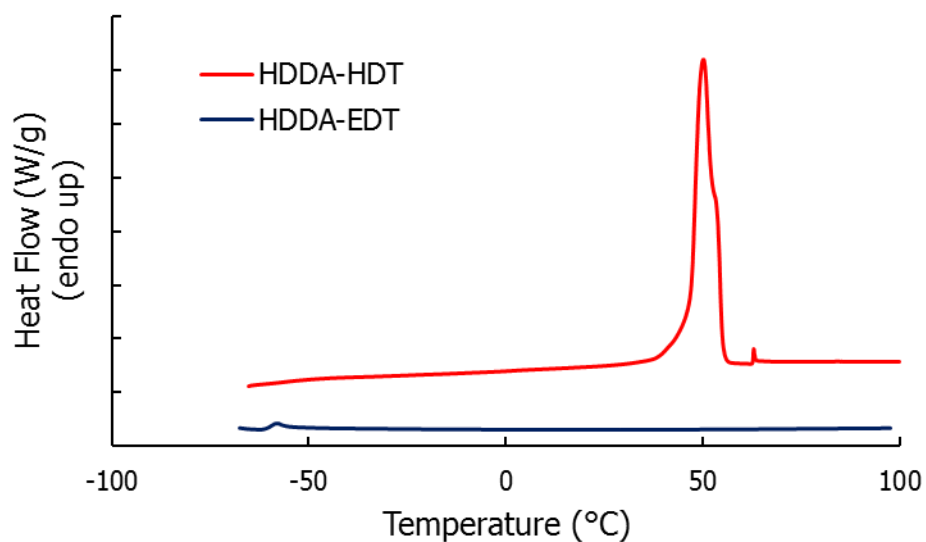

Figure S1: DSC of soft segment homopolymers

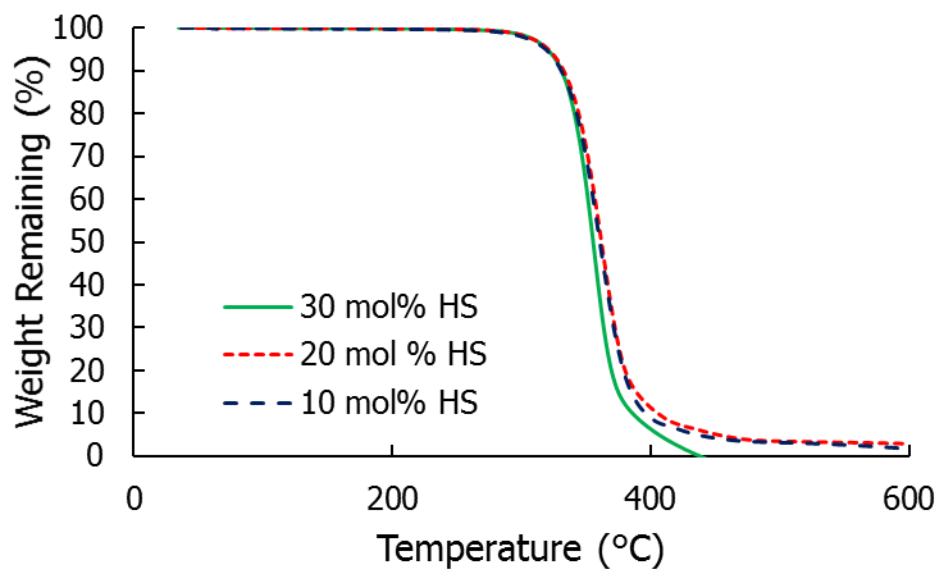

Figure S2: TGA of polymer samples

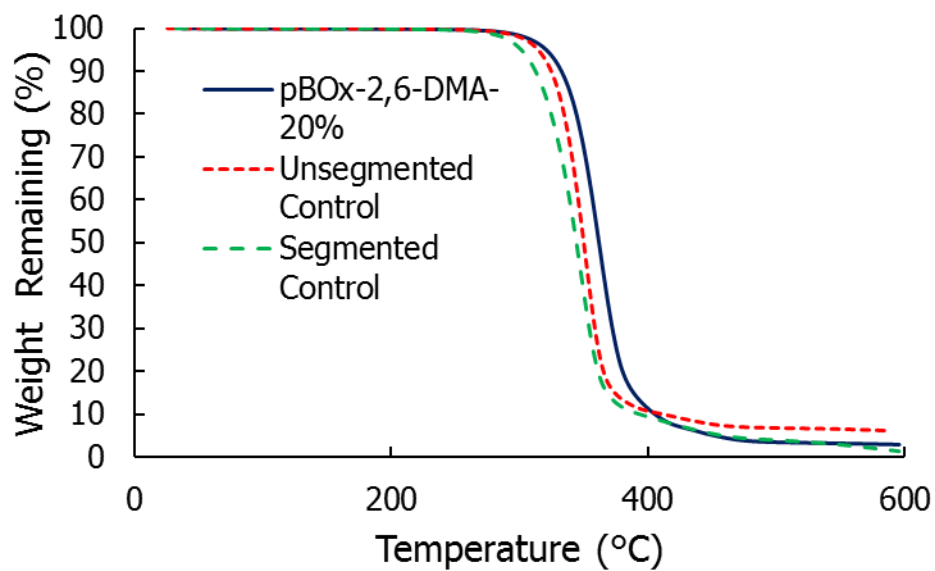

Figure S3: TGA of control copolymer analogs

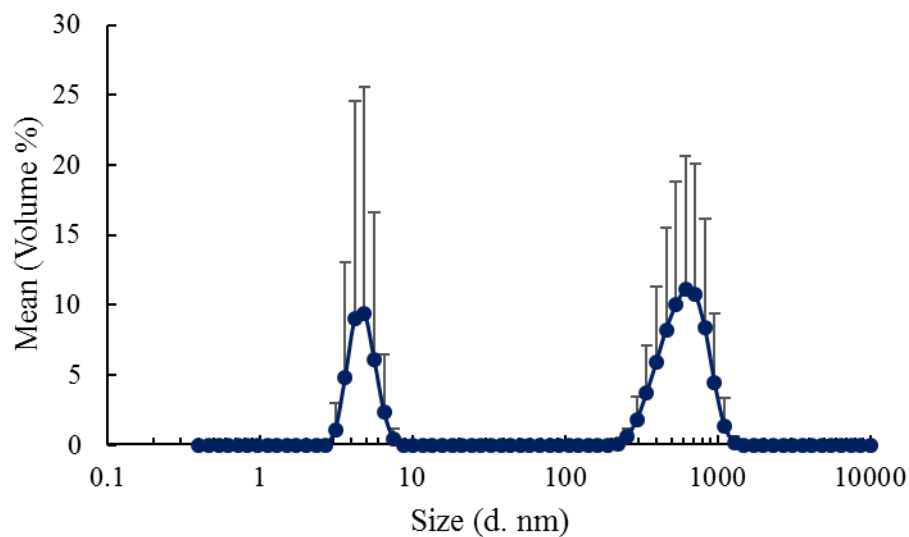

Figure S4: Example DLS Particle volume Distribution in DMF with 0.05M LiBr for 10 mol % BOx-2,6-DMA sample 1 mg/mL. Volume statistics reported after three samplings.

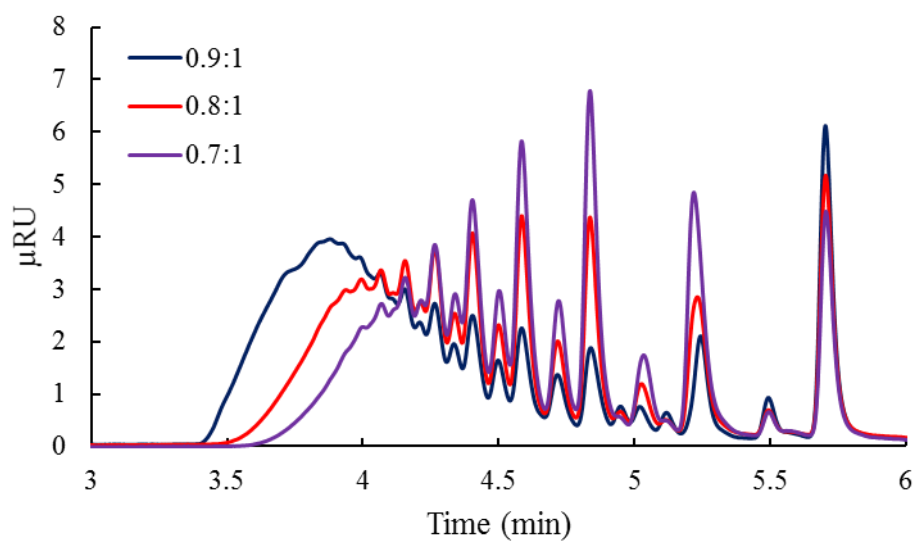

Figure S5: APC chromatogram for model soft-segment oligomers with n-mer resolution

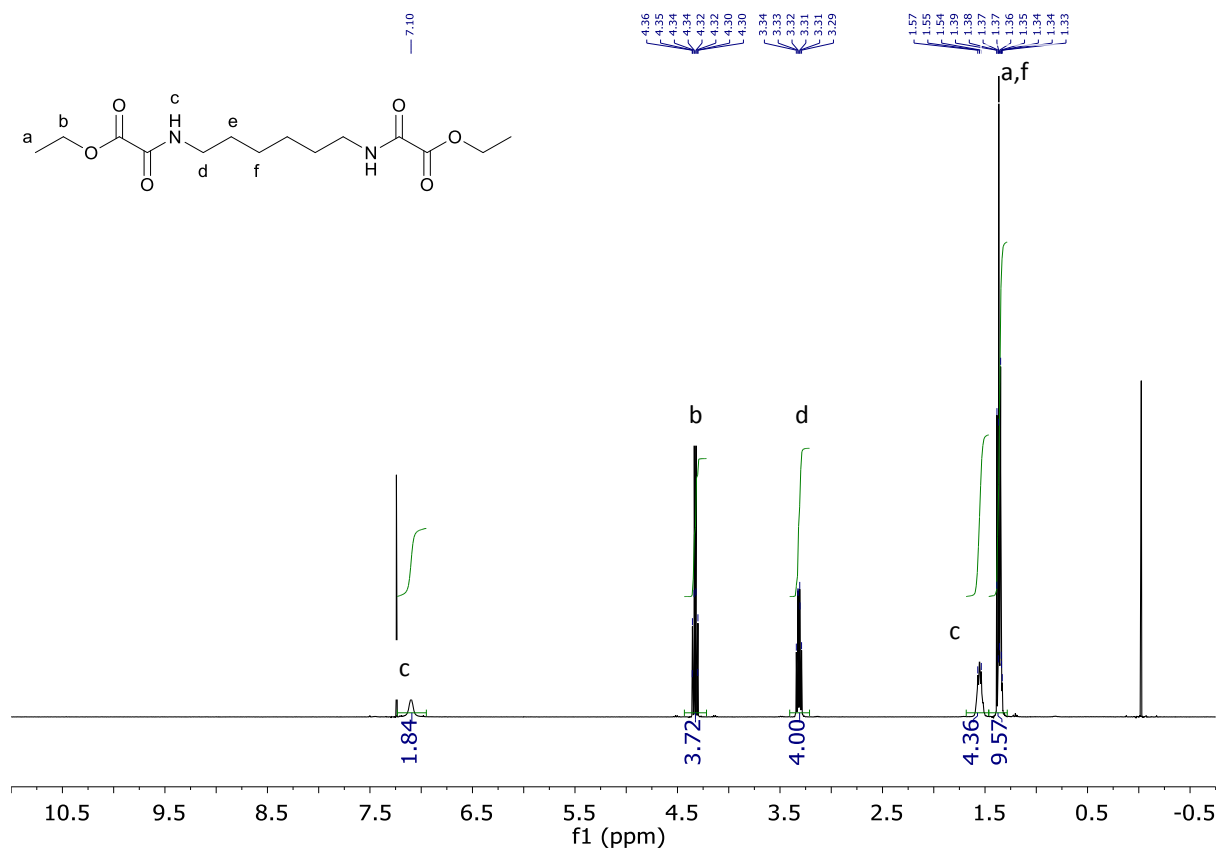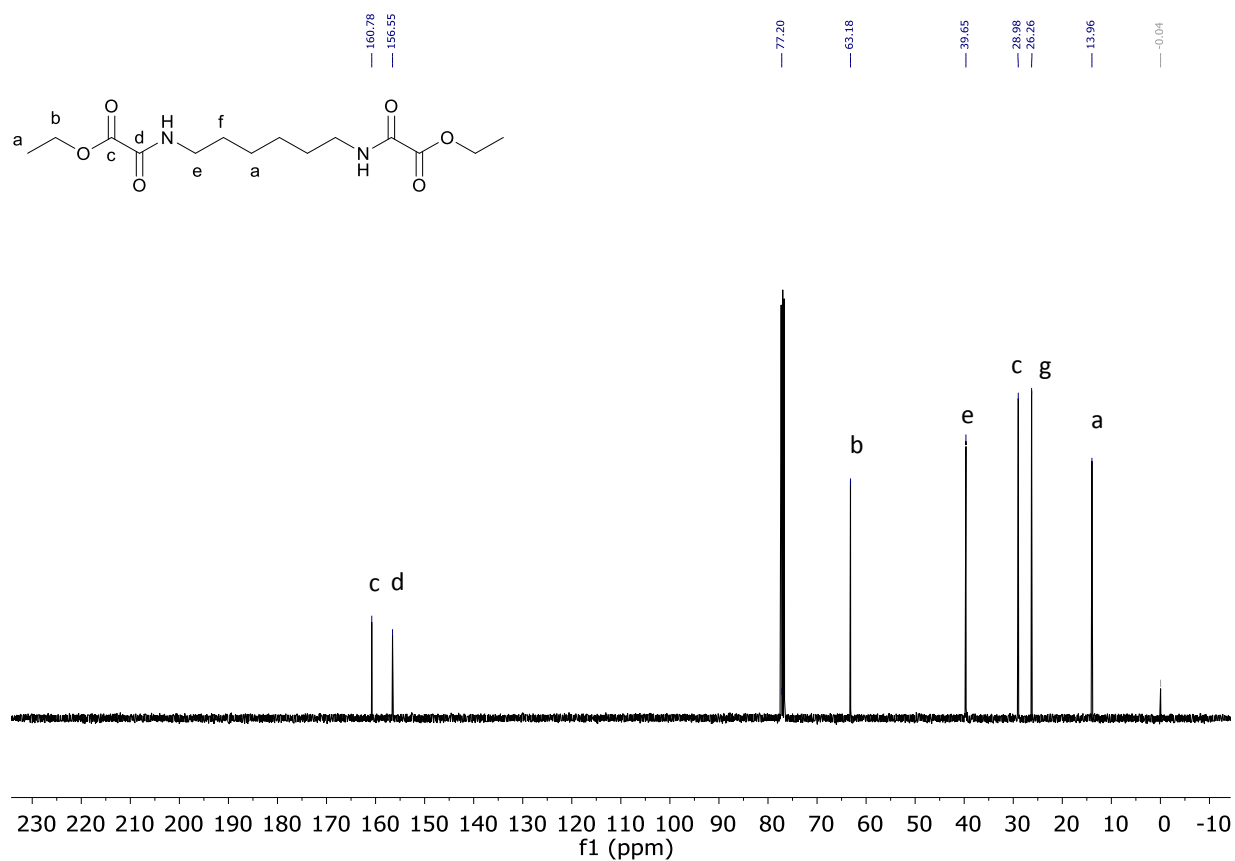

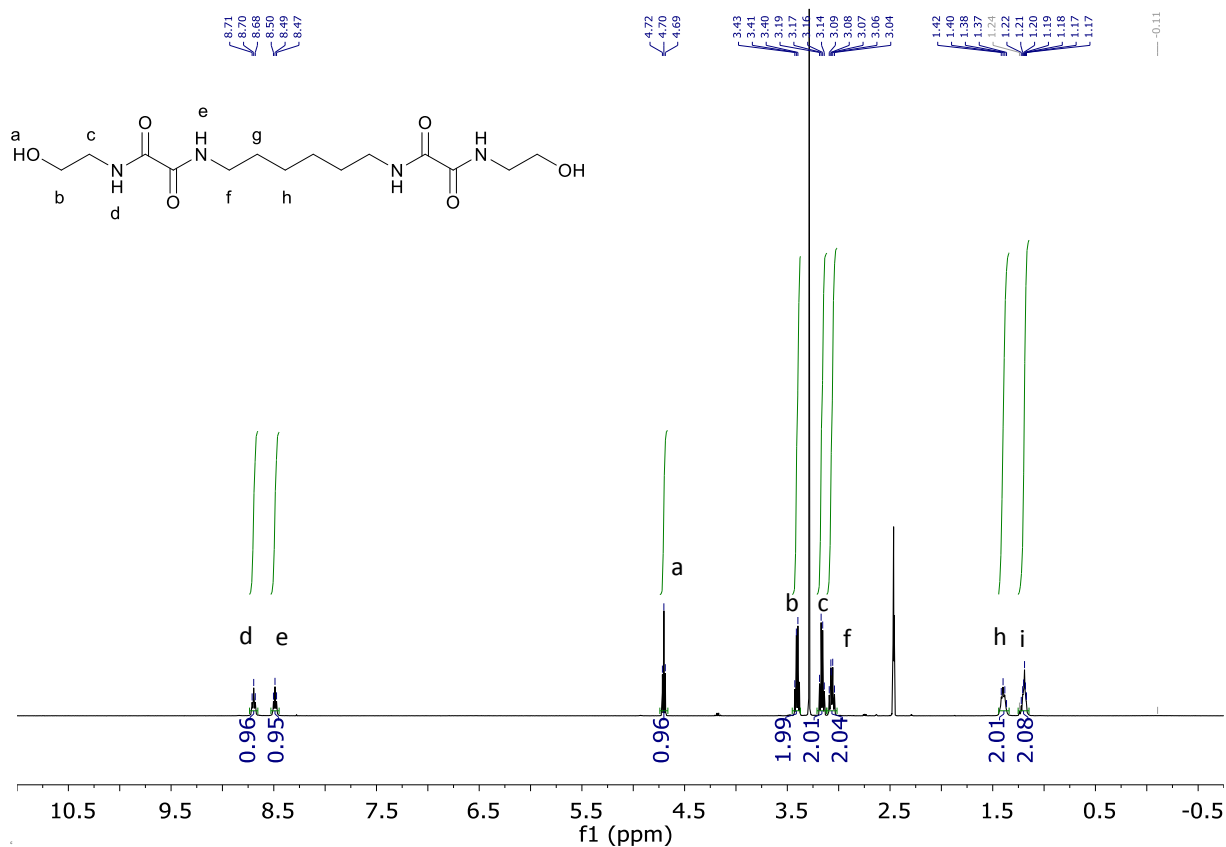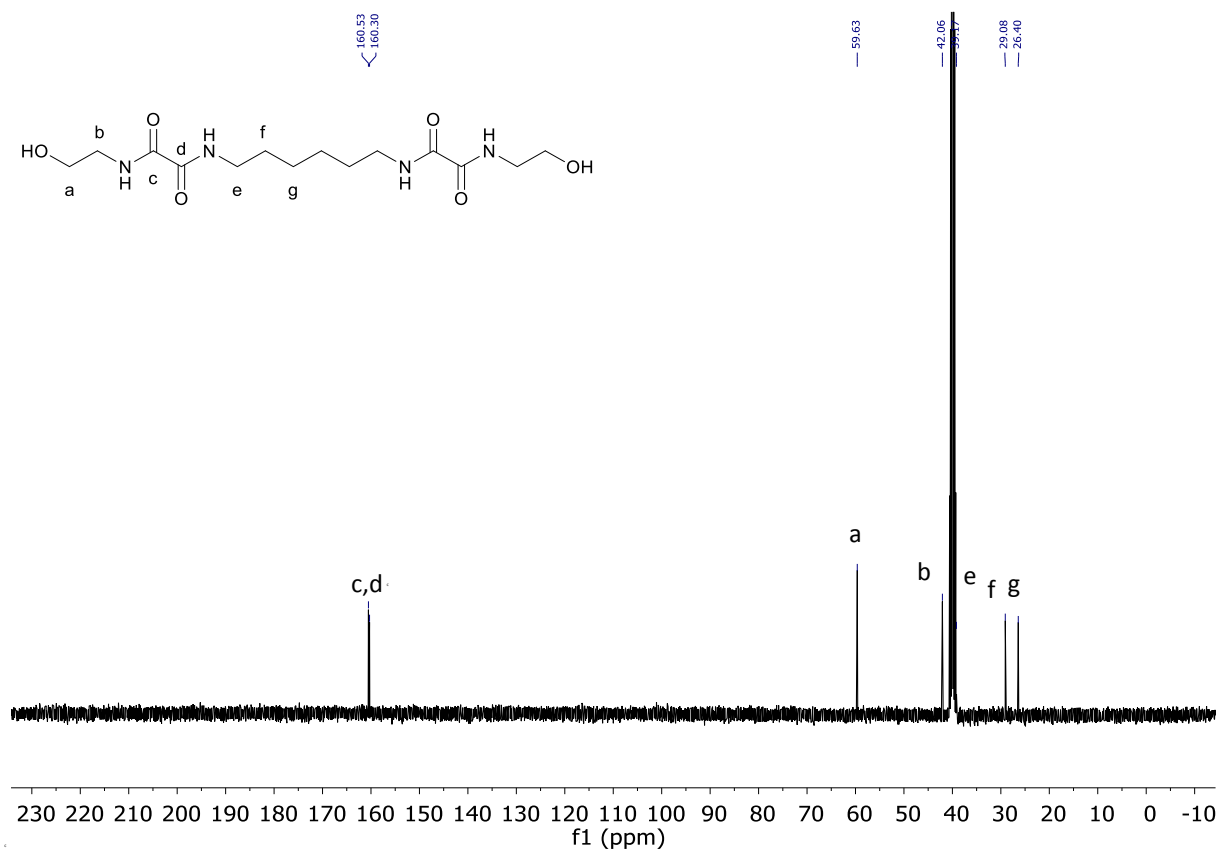

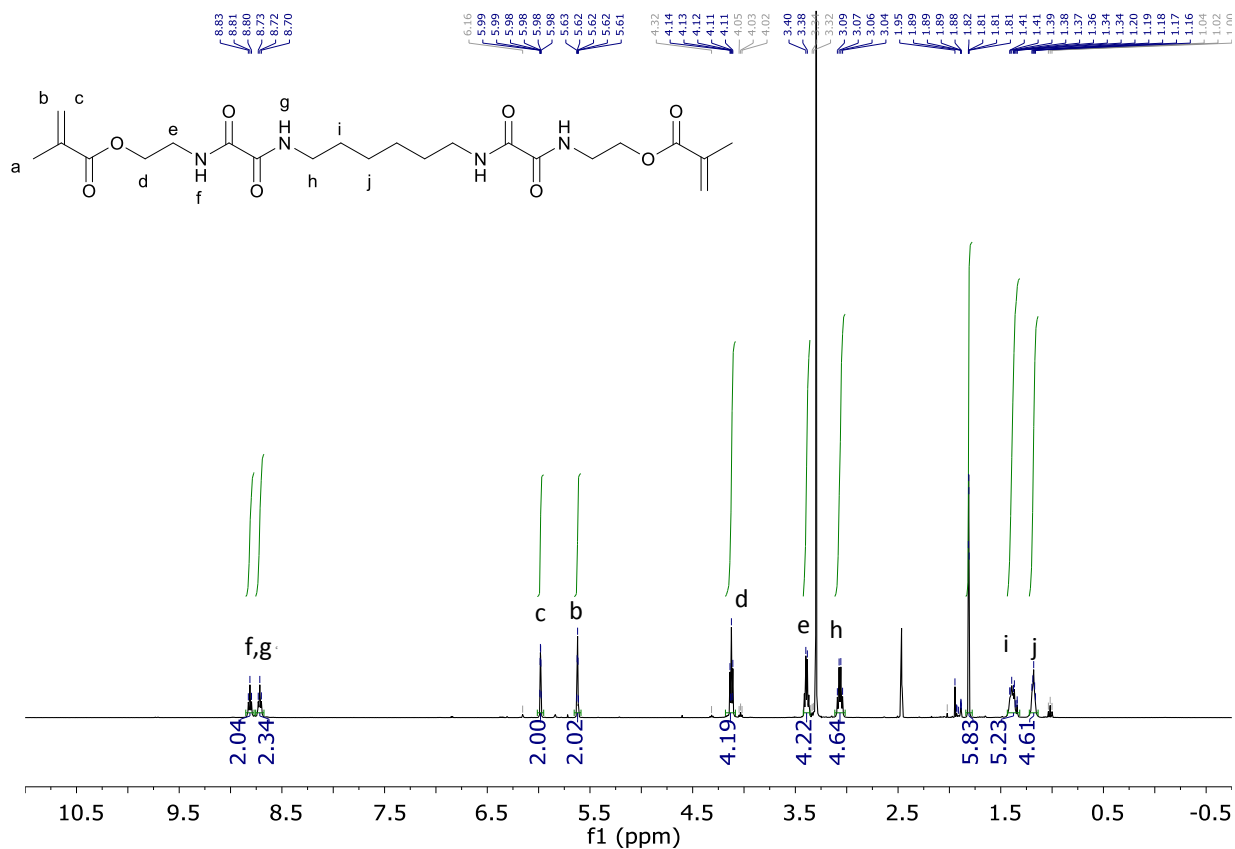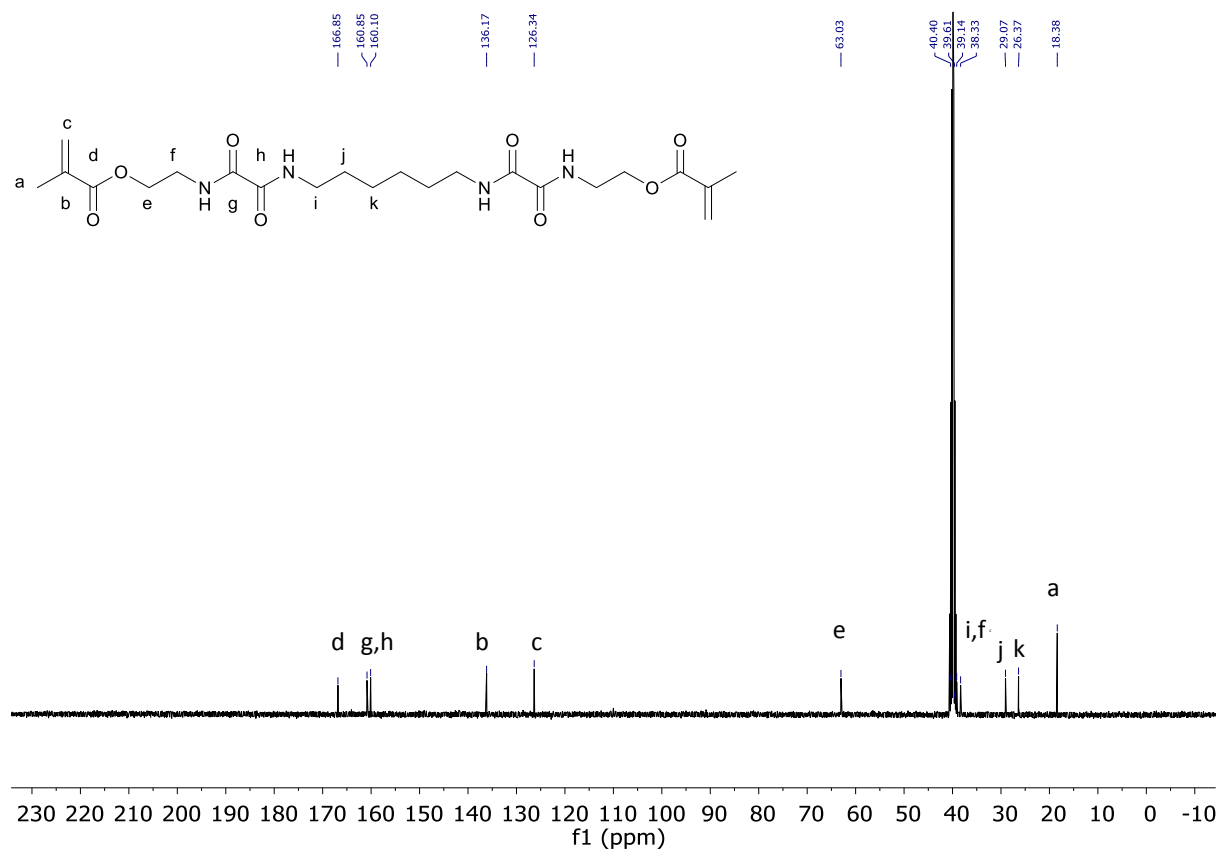

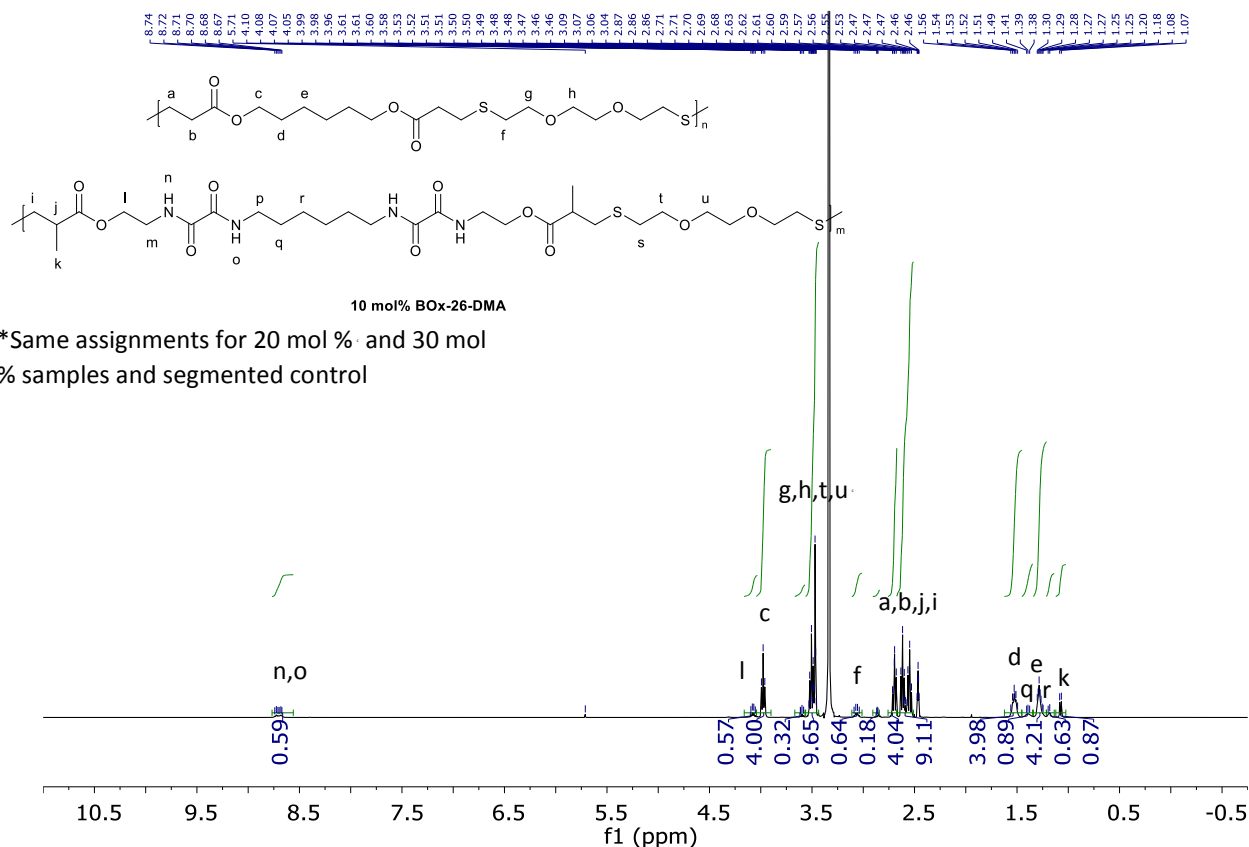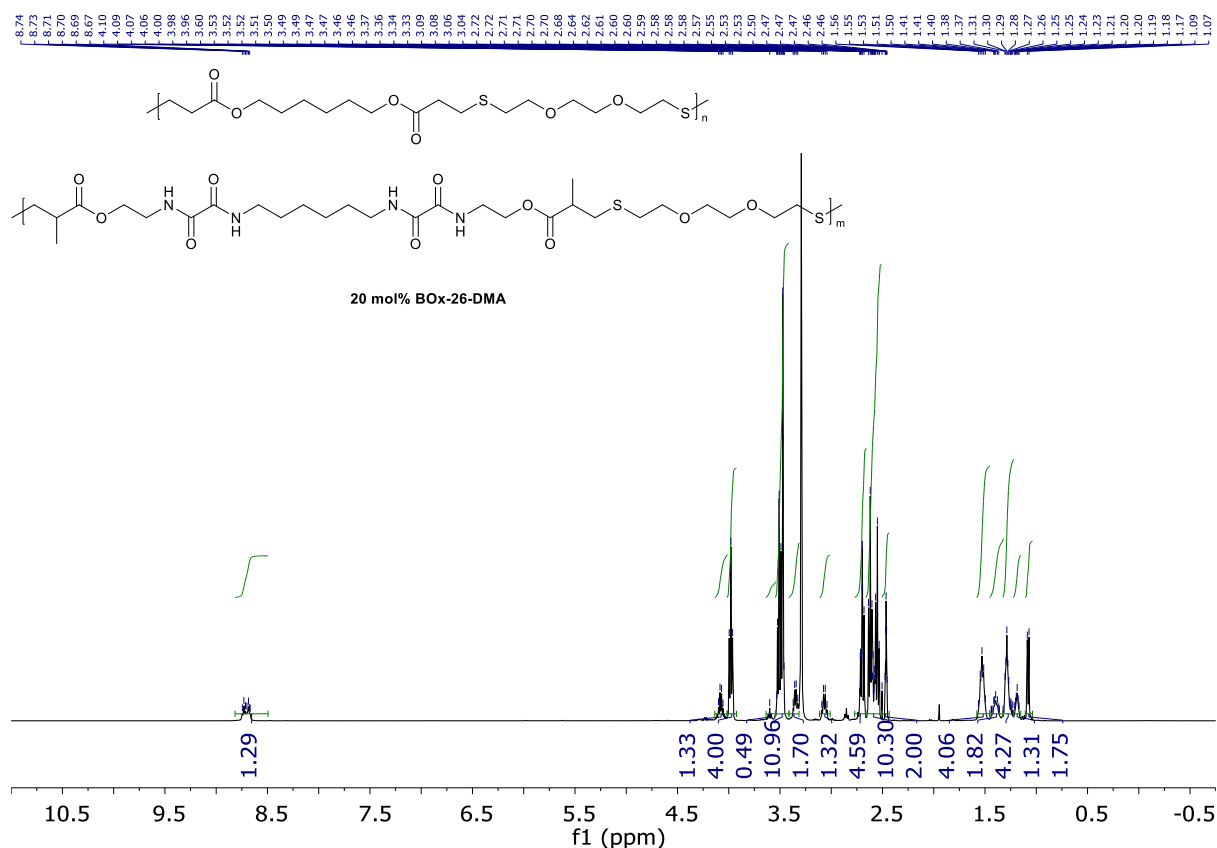





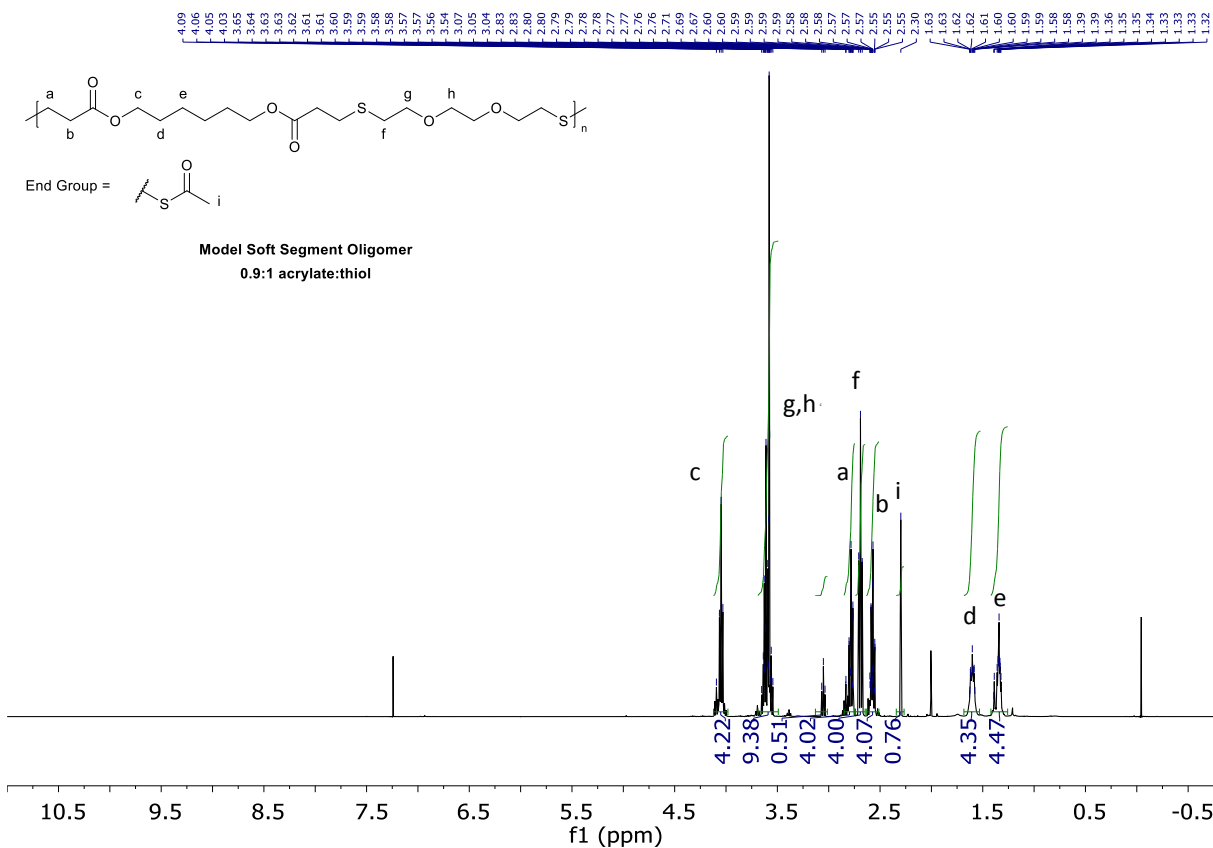

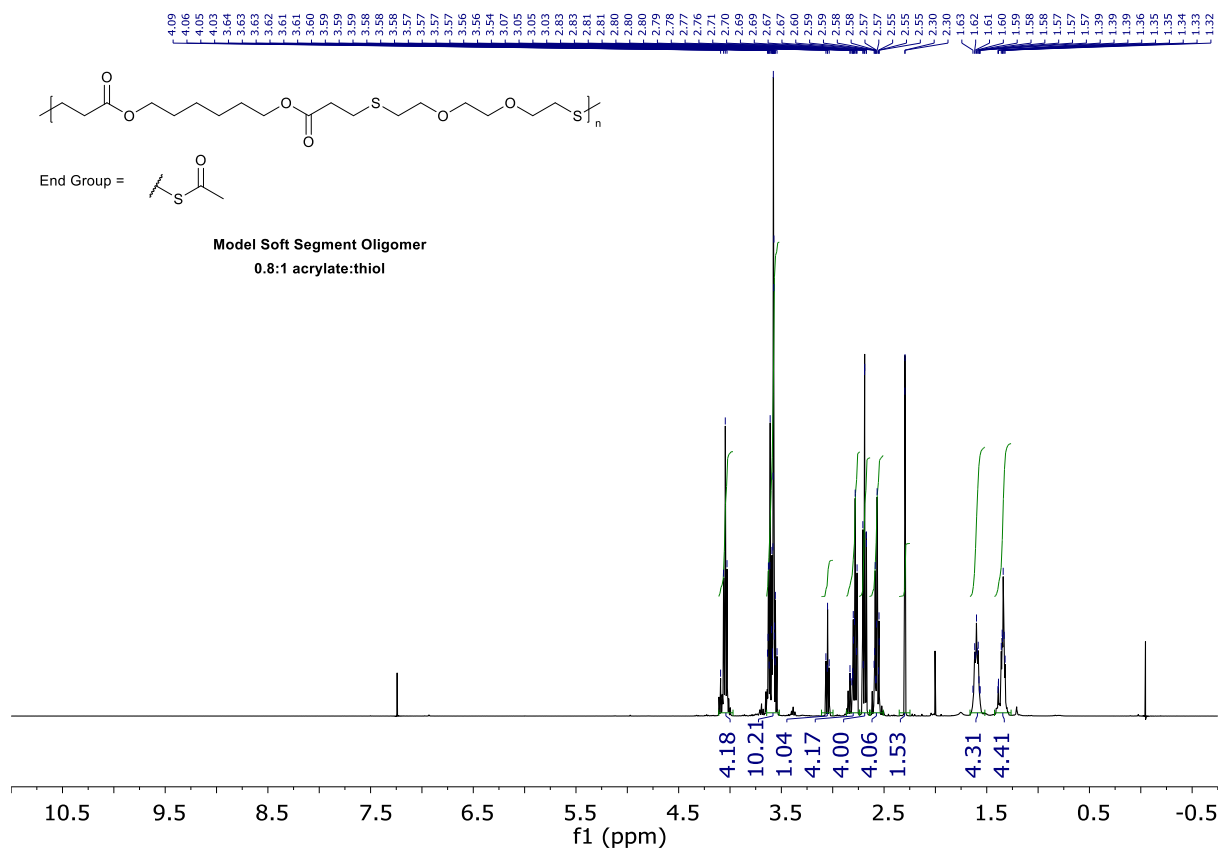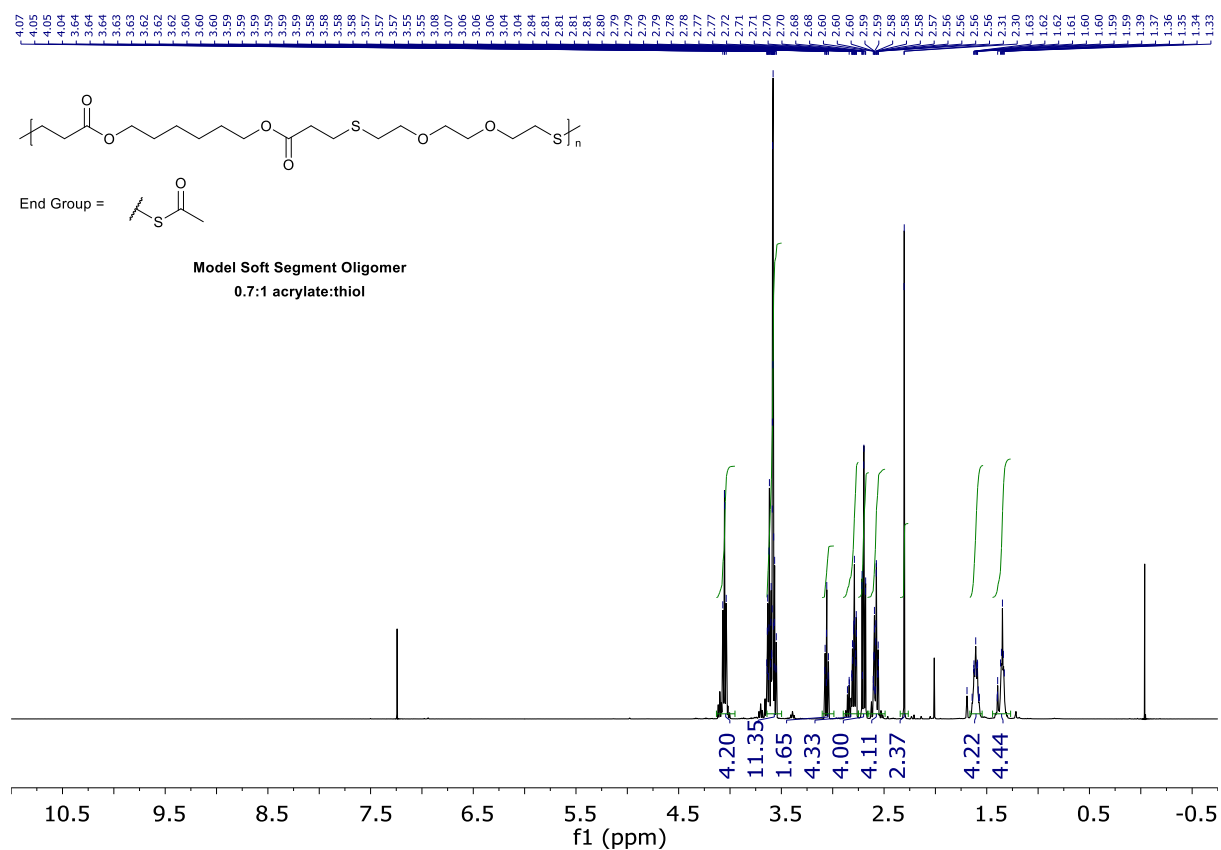

Supplement: c7py00021a1.pdf [file c7py00021a1.pdf]
